# Supplementary material for: An Unbiased Estimator of Gene Diversity with Improved Variance for Samples Containing Related and Inbred Individuals of any Ploidy
Source: PubMed Central journal article supplement (PMC5295611; doi:10.1534/g3.116.037168), 2016-12-30
Supplement: 671FigureS1.pdf [file 671FigureS1.pdf]

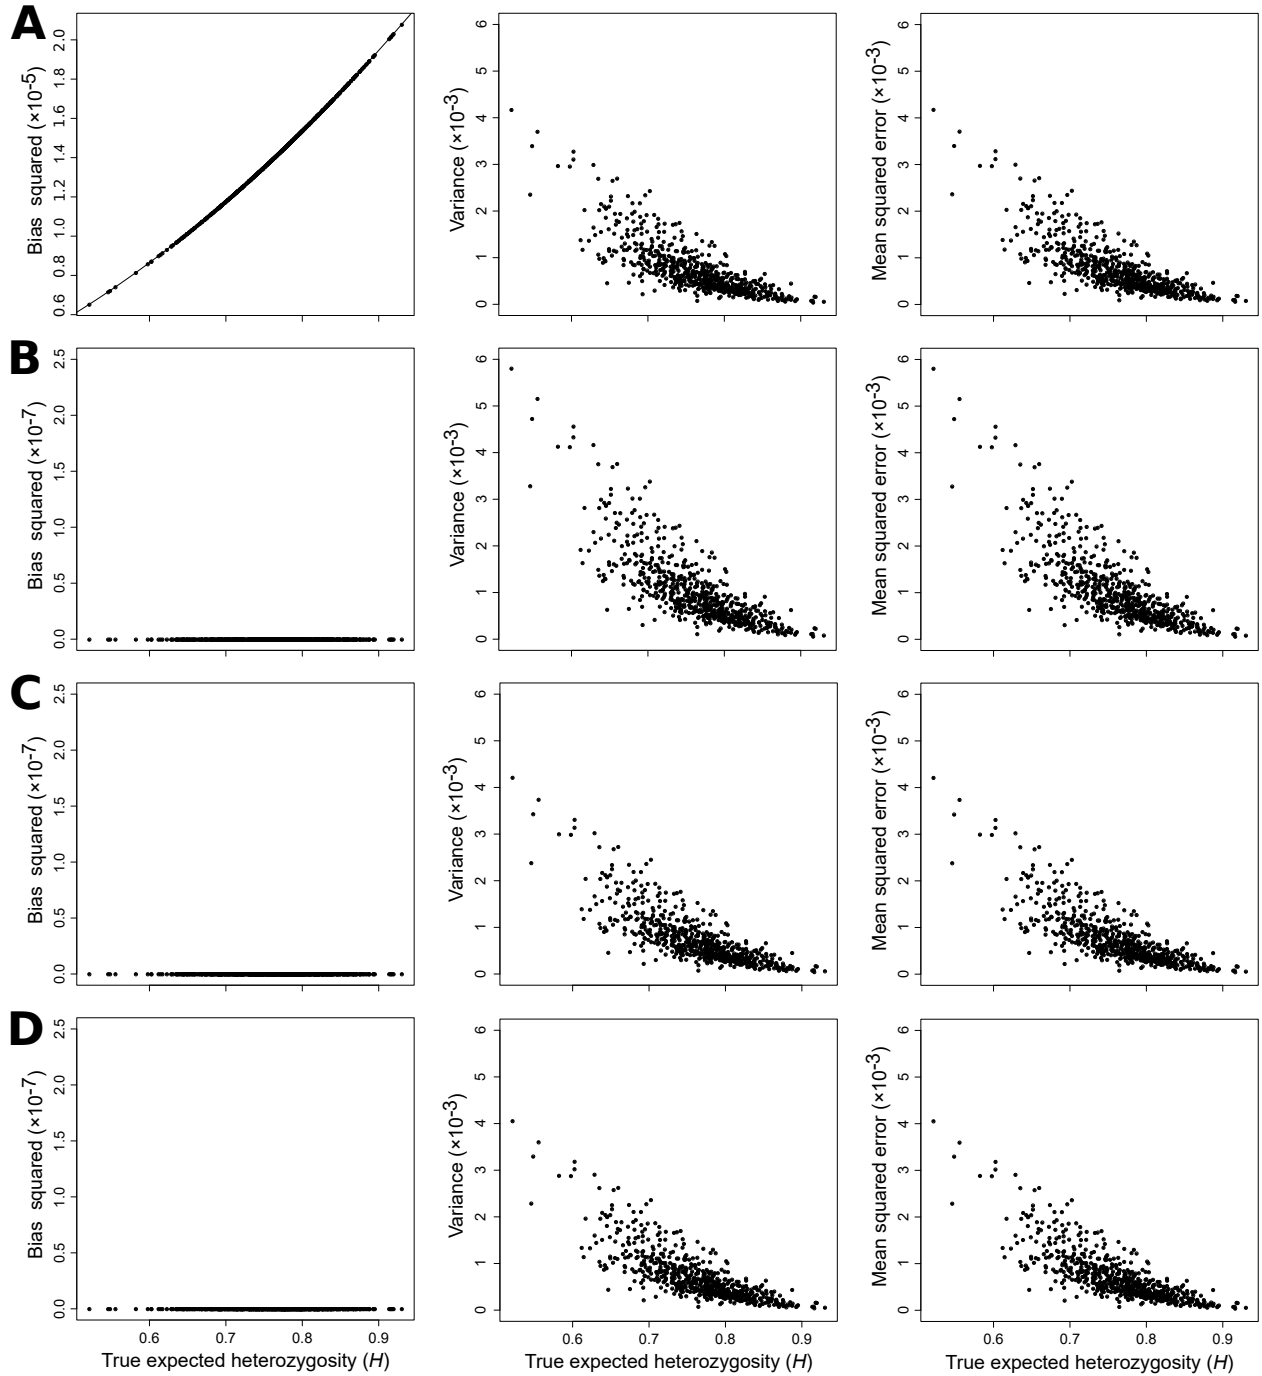

Figure S1: Theoretical squared bias, variance, and mean squared error of the estimators  $\hat{H}_{full}$  (A),  $\hat{H}_{red}$  (B),  $\tilde{H}$  (C), and  $\tilde{H}_{BLUE}$  (D), calculated at each of 645 loci ( $0.5212 \leq H \leq 0.9301$ ) in the MS5795 dataset for 60 individuals wherein each individual was related to exactly one other. The relatedness of the sample was fixed at 10 inbred full-siblings ( $\Phi = 3/8$ ), 10 outbred full-siblings ( $\Phi = 1/4$ ), and 10 outbred avuncular pairs ( $\Phi = 1/8$ ). The curve in the squared bias panel of (A) is described in Equation A10. See Supplementary Data for the true expected heterozygosity values incorporated into those calculations.
