# Supplementary material for: An Unbiased Estimator of Gene Diversity with Improved Variance for Samples Containing Related and Inbred Individuals of any Ploidy
Source: PubMed Central journal article supplement (PMC5295611; doi:10.1534/g3.116.037168), 2016-12-30
Supplement: 671FigureS7.pdf [file 671FigureS7.pdf]

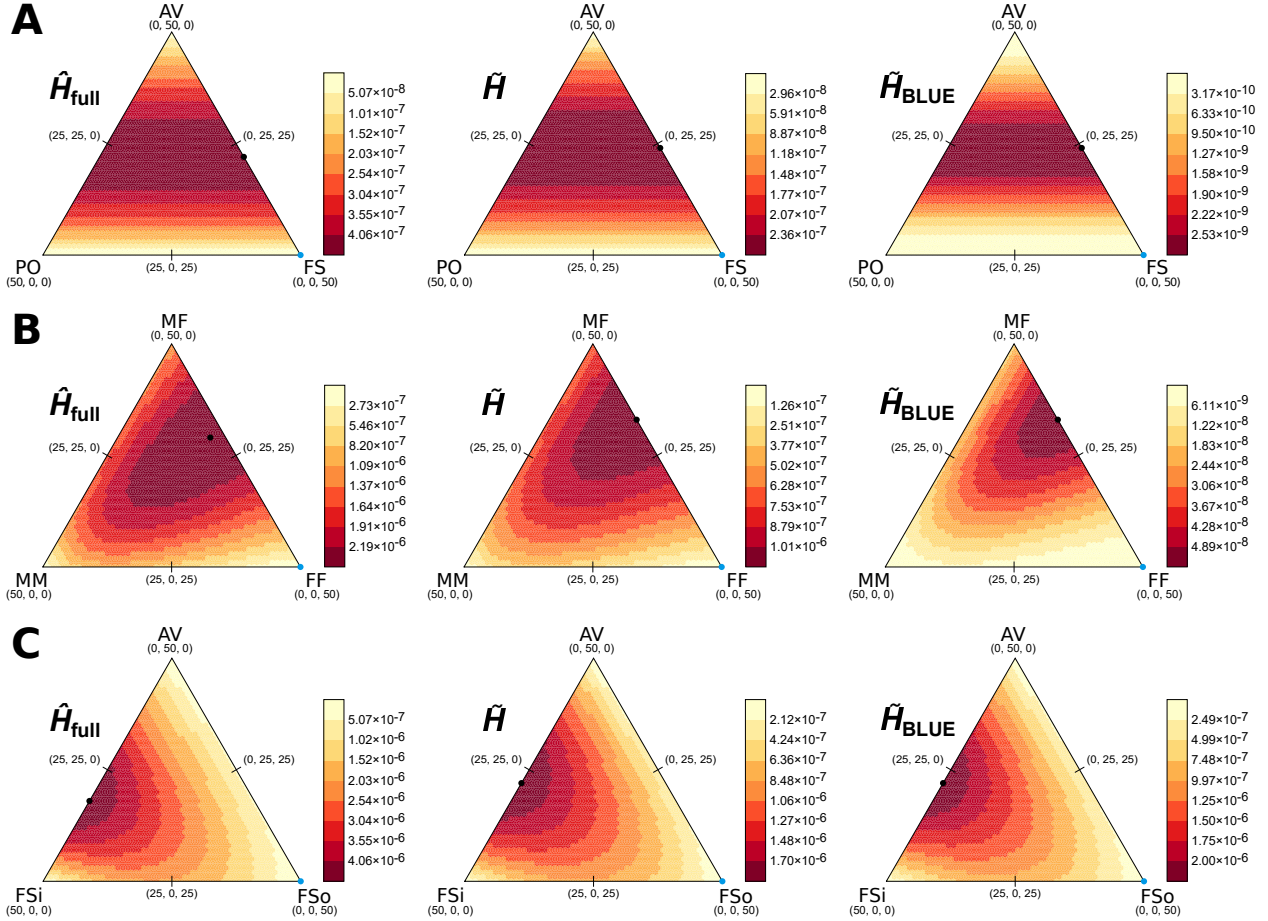

Figure S7: Theoretical difference in mean squared error between the estimators  $\hat{H}_{full}$ ,  $\hat{H}_{red}$ ,  $\tilde{H}$ , and  $\tilde{H}_{BLUE}$  for samples fixed at 100 (A) diploid individuals, (B) male and female individuals at an X-linked locus, or (C) diploid individuals wherein some full siblings are inbred with brother-sister parents, across changing sample configurations. Here, the MSE of the estimator calculated with  $\tilde{p}_i$  is subtracted from that of the same estimator calculated with  $\hat{p}_i$ , yielding a value greater than zero. The samples considered for each subtraction are as in Supplementary Figures S4-S6. Threshold values for coloration are indicated in the scales to the right of each triangle. Note that scales are not identical across heat maps. A heat map corresponding to  $\hat{H}_{red}$  is not included because all sample configurations yield a value of zero for this calculation.
