# Supplementary material for: An Unbiased Estimator of Gene Diversity with Improved Variance for Samples Containing Related and Inbred Individuals of any Ploidy
Source: PubMed Central journal article supplement (PMC5295611; doi:10.1534/g3.116.037168), 2016-12-30
Supplement: 671FigureS9.pdf [file 671FigureS9.pdf]

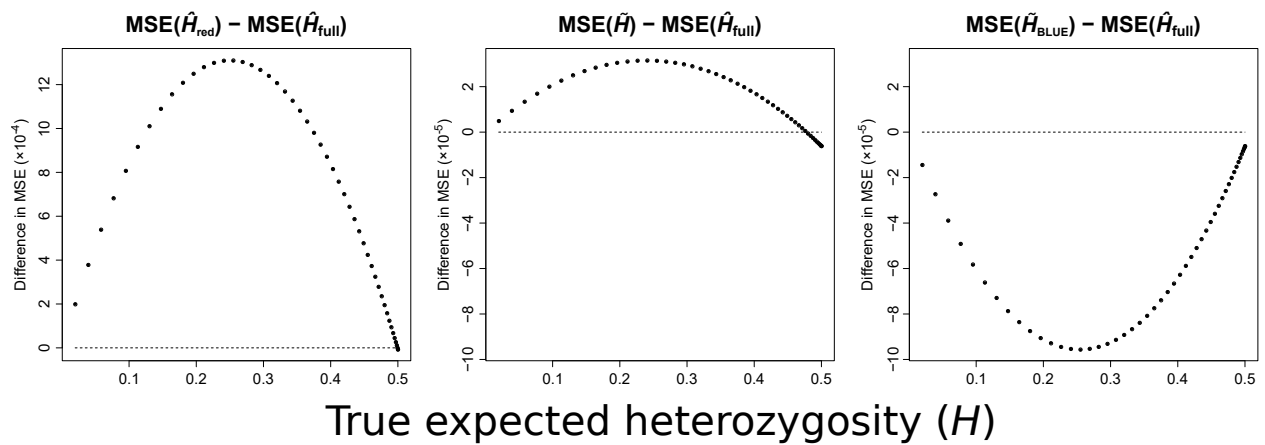

Figure S9: Theoretical difference in mean squared error between the unbiased estimator  $\hat{H}_{red}$  (left),  $\tilde{H}$  (center), or  $\tilde{H}_{BLUE}$  (right) and the biased estimator  $\hat{H}_{full}$  calculated at each of 50 SNP simulated loci ( $0.0198 \leq H \leq 0.5$ ) for samples of 60 diploid individuals containing some inbred relative pairs. Each sampled individual was related to exactly one other, and samples contained 10 pairs of inbred full-siblings ( $\Phi = 3/8$ ), 10 pairs of outbred full-siblings ( $\Phi = 1/4$ ), and 10 outbred avuncular pairs ( $\Phi = 1/8$ ). Dotted lines in each plot correspond to a difference in MSE of zero with  $\hat{H}_{full}$ . See Supplementary Data for the true expected heterozygosity values incorporated into analytical calculations (SNP loci are labeled as SNP01-SNP50).
